# Supplementary material for: The Arabidopsis homolog of human G3BP1 is a key regulator of stomatal and apoplastic immunity
Source: PubMed Central journal article supplement (PMC6238584; doi:10.26508/lsa.201800046), 2018-05-31
Supplement: LSA-2018-00046_TableS1.pdf [file LSA-2018-00046_TableS1.pdf]

# Table S1.

| S. No.    | ATG No.               | Vector used  | STOP codon   | Cloned from | by                   | Purpose                | Tag  |
|-----------|-----------------------|--------------|--------------|-------------|----------------------|------------------------|------|
| pNR24 2   | AT5G48650             | pENTR-D/TOPO | without stop | PDA-12652   | PCR and TOPO cloning | Gateway entry          | None |
| pMHN275   | AT5G48650             | pGWB5        | No stop      | pNR24 2     | LR Clonase           | Localization/OE lines  | GFP  |
| pAA(B1)   | Promoter of AT5G48650 | pENTR-D/TOPO | without stop | pdg06741    | PCR and TOPO cloning | Promoter Gateway entry | None |
| pAA(B1-2) | Promoter of AT5G48650 | pGWB433      | No stop      | pAA(B1)     | LR Clonase           | Promoter analysis      | Gus  |

| Name           | Sequence                                                          | Target gene | Purpose                                                            |
|----------------|-------------------------------------------------------------------|-------------|--------------------------------------------------------------------|
| <b>Cloning</b> |                                                                   |             |                                                                    |
| N0030          | CACCATGGATTCTACTGCTGCAACCA                                        | AT5G48650   | For cloning into Gateway pENTR-TOPO-F                              |
| N0031          | CTWGTACGAGTTGATGCTGGCGA                                           | AT5G48650   | For cloning into Gateway pENTR-TOPO-R                              |
| AA013          | GGGGACAAGTTTGTACAAAAAAGCAGGCTTCGAAGGAGATAGAACCttttccgtagacgctcgag | AT5G48650   | Cloning the gene under native promoter-F                           |
| AA014          | GGGGACCACCTTTGTACAAGAAAGCTGGGTCTCCACCTCCGGATCMGTACGAGTTGATGCTGGC  | AT5G48650   | Cloning the gene under native promoter-R                           |
| AA090          | CAC CTT TTT CCG GTA GAC CGT C                                     | AT5G48650   | Only promoter before ATG for cloning into Gateway pENTR-TOPO-GUS-F |
| AA091          | TGT ATC GCC AAC TTC CAG AGA ATA AAC                               | AT5G48650   | Only promoter before ATG for cloning into Gateway pENTR-TOPO-GUS-R |

| <b>Genotyping</b> |                                   |           |                                     |
|-------------------|-----------------------------------|-----------|-------------------------------------|
| N0107             | AGATGGGGAAAGTTGTTCTGG             | AT5G48650 | LP1for genotyping Atg3bp1-1 for WT  |
| N0118             | CTCTACCAACTGGTGAGTCGC             | AT5G48650 | LP1for genotyping Atg3bp1-2 for WT  |
| N0165             | CGTTTTGCTACTTTGCTCACC             | AT5G48650 | RP1-for genotyping Atg3bp1-1 or HM  |
| N0167             | TGAAAGTTTATGCAGATGGGG             | AT5G48650 | RP1-for genotyping Atg3bp1-2 for HM |
| N0200             | ATTTTGCCGATTCGGAAC                | AT5G48650 | Primer T-DNA-LBb1.3 for SALK        |
| N0201             | TAGCATCTGAATTCATAACCAATCTCGATACAC | AT5G48650 | Primer T-DNA-LB3 for SALK           |

| <b>qPCR</b> |                         |           |                         |
|-------------|-------------------------|-----------|-------------------------|
| AA155       | TGGAGATTGCAACTCGGCTG    | AT5G48650 | AtG3BP1-F               |
| AA156       | TCTTGC GGCGCAAGGAAAAA   | AT5G48650 | AtG3BP1-R               |
| AA021       | ACCACCTGAAAGGAAGTACAGTG | AT3g18780 | Refrence gene-Actin-F   |
| AA022       | CTGTGAACGATTCTGGACCTGC  | AT3g18780 | Refrence gene-Actin-R   |
| AA111       | GGCCTTGATAATCCCTGATGA   | At4g05320 | Refrence gene-UBQ10-F   |
| AA112       | AAAGAGATAACAGGAACGGAAA  | At4g05320 | Refrence gene-UBQ10-R   |
| AA115       | ACGGGCATAGTCCACAAAAG    | AT2G19190 | FRK1-F                  |
| AA116       | CGTCAAAAAGAACGACGATGA   | AT2G19190 | FRK1-R                  |
| AA117       | ACAATATGGTCTGCTATAGCT   | AT1G18570 | MYB51-F                 |
| AA118       | CTTGTGTGTAAGTGGATCAA    | AT1G18570 | MYB51-R                 |
| AA119       | GCGTAAATACGGGACGAAAC    | AT4G23550 | WRKY29-F                |
| AA120       | GGTTTGGGTTGGGAAGTTTT    | AT4G23550 | WRKY29-R                |
| 392s        | GGCGAAGAGTGAAGCTTTTG    | AT5G26920 | CBP60g-F                |
| 392as       | GCACGGAGGATGATGTTTTT    | AT5G26920 | CBP60g-R                |
| 193s        | AGACATCGTTGCTCTTCACG    | AT1G73805 | SARD1-F                 |
| 193as       | CACACTTACTTCTCCGGCAA    | AT1G73805 | SARD1-R                 |
| 196s        | GACGGGTATCTTTGGAGGAA    | AT5G22570 | WRKY38-F                |
| 196as       | AAACCGGAGGATTGCTTTTG    | AT5G22570 | WRKY38-R                |
| ksk-145     | TATGGGGGATAAAGGGGTCT    | AT1G74710 | ICS1-F                  |
| ksk-146     | GCCCTAGTTACAACCCGAAA    | AT1G74710 | ICS1-R                  |
| HA238       | CTCATACACTCTGGTGGG      | AT2G14610 | PR1-F                   |
| HA239       | TTGGCACATCCGAGTC        | AT2G14610 | PR1-R                   |
| ksk-155     | ATCGTTGGAAATCGTGGTGT    | AT3G57260 | PR2-F                   |
| ksk-156     | TCGGTGATCCATTCTTCACA    | AT3G57260 | PR2-R                   |
| R195S       | CACGGAACGTAGACGAGAA     | AT1G02450 | NIMIN1-F                |
| R195AS      | CCCCTACGACACTGAGAGAA    | AT1G02450 | NIMIN1-R                |
| AA147       | CAAGAGCCTTGATCGATCATTG  | AT4G18170 | WRKY28-F                |
| AA148       | GCAAGCCCAACTGTCTCAATC   | AT4G18170 | WRKY28-R                |
| AA139       | TTCATGGATCCAAAATCCTAGA  | AT2G46400 | WRKY46-F                |
| AA140       | TGTGGTTTCCGAGATCTTCACT  | AT2G46400 | WRKY46-R                |
| AA191       | GGTCTTGGCGATACAAT       | AT4G39030 | EDS5-F                  |
| AA192       | CAGCGAGTGCAGAGATC       | AT4G39030 | EDS5-R                  |
| N0429       | ACTCCGTTAGCTTCAACCCTT   | AT3G59930 | defensin-like protein-F |
| N0430       | CATGACGATCGCTCTCAG      | AT3G59930 | defensin-like protein-R |
| AA141       | ACAGCACTTGTCTCGATTCT    | AT1G21250 | WAK1-F                  |
| AA142       | TCTTTACGCTTGACAGCTCAT   | AT1G21250 | WAK1-R                  |
| AA149       | ATGATCTCTCCGTGTGCCA     | AT5G46350 | WRKY8-F                 |
| AA150       | ATCATCAAGGCTCTTTTGAAGA  | AT5G46350 | WRKY8-R                 |
| AA143       | GATCCACCGACAAGTGCTT     | AT1G80840 | WRKY40-F                |
| AA144       | AGGGCTGATTTGATCCCTCT    | AT1G80840 | WRKY40-R                |
| AA145       | CATTGGAAACGATGGAAG      | AT4G12470 | AZ11 -F                 |
| AA146       | TCTGAGGGCTAACGTTCTTG    | AT4G12470 | AZ11 -R                 |
| AA193       | TTAGCCGTTGAAGCTCT       | AT3G52430 | PAD4 -F                 |
| AA194       | ATGCATCGCAACGATCT       | AT3G52430 | PAD4 -R                 |
| AA195       | CTGAGTTAGCCGGTGT        | AT3G48090 | EDS1-F                  |
| AA196       | TTTCATGTACGGCCCTG       | AT3G48090 | EDS1-R                  |
| AA183       | GCATCTCGTCTCAG          | At1g52890 | ANAC019-F               |
| AA184       | CTCGACTTCTCCTCCG        | At1g52890 | ANAC019-R               |
| AA185       | GCGCTGCCTCATAGTC        | At3g15500 | ANAC055-F               |
| AA186       | CGAGGAATCCCTCAGT        | At3g15500 | ANAC055-R               |
| AA187       | TGGGTGTTGTGTCGAAT       | At4G27410 | ANAC072-F               |
| AA188       | ATCGTAACCAACCGTAAT      | At4G27410 | ANAC072-R               |
